# Supplementary material for: The potato cyst nematode effector RHA1B is a ubiquitin ligase and uses two distinct mechanisms to suppress plant immune signaling
Source: PubMed Central journal article supplement (PMC6461251; doi:10.1371/journal.ppat.1007720), 2019-04-12
Supplement: ppat.1007720.s001.pdf [file ppat.1007720.s001.pdf]

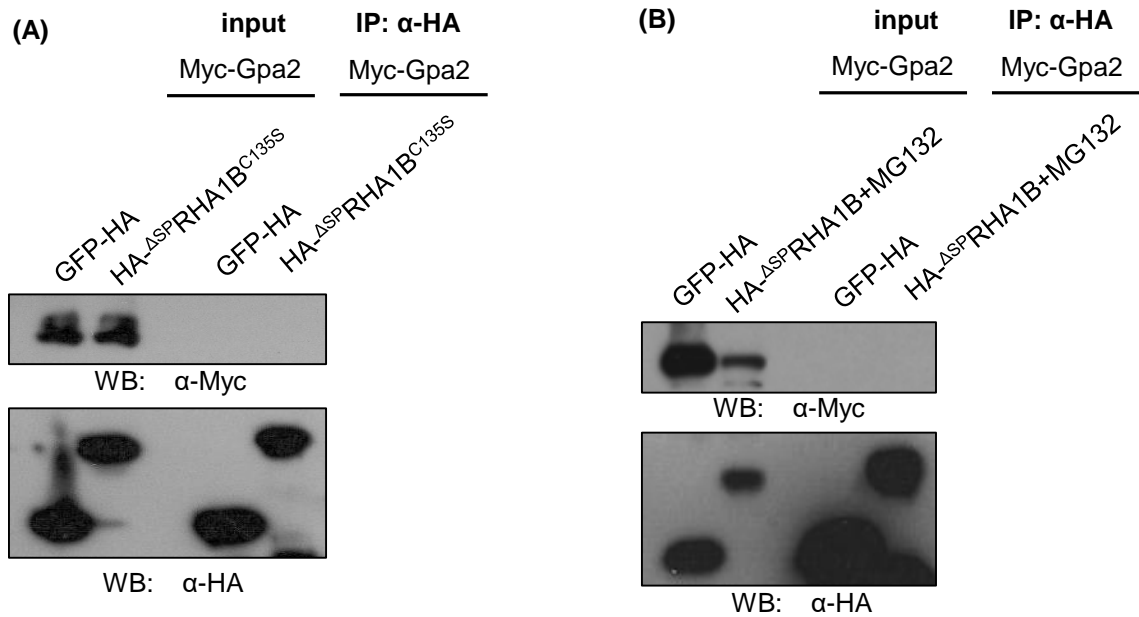

**S1 Fig. RHA1B does not interact with Gpa2 *in vivo*.** Neither (A)  $\Delta$ SPRHA1B<sup>C135S</sup> E3-ligase deficient mutant nor (B) RHA1B (in the presence of MG132 proteasomal inhibitor to prevent Gpa2 degradation) immunoprecipitated with Gpa2 *in vivo*. Immunoprecipitation was carried out with anti-HA agarose beads. The accumulation of tested proteins was verified by WB using appropriate antibodies.
