# Supplementary material for: The potato cyst nematode effector RHA1B is a ubiquitin ligase and uses two distinct mechanisms to suppress plant immune signaling
Source: PubMed Central journal article supplement (PMC6461251; doi:10.1371/journal.ppat.1007720), 2019-04-12
Supplement: ppat.1007720.s002.pdf [file ppat.1007720.s002.pdf]

**S1 Table. Primers used in this study**

| <b>Name</b>           | <b>Sequence</b>                    | <b>Construct</b>                                        |                              |
|-----------------------|------------------------------------|---------------------------------------------------------|------------------------------|
| RHA1B FBamHI ΔSP      | agggatccggcaatttatttaacattggcggtaa | pBTEX::GFP-RHA1B                                        |                              |
| RHA1B RSall           | aggtcgactcatggagactccggtgggc       | pBTEX::HA-RHA1B<br>pBIN::HA-RHA1B<br>pMAL-c2::MBP-RHA1B |                              |
| RHA1B C135S F         | gcgagtgcccaattagttggaatcattgtca    | mutagenesis C135S                                       |                              |
| RHA1B C135S R         | tgacaatgattccaaactaattggcactccgc   |                                                         |                              |
| RHA1B K146R F         | gcggaagcagatgtgaggggaattgcgctcttg  | mutagenesis K146R                                       |                              |
| RHA1B K146R R         | gcaagagcgcaattccctcacatctgctccgc   |                                                         |                              |
| <i>Nb</i> EF1 RTF     | aaggtccagtatgcttgggtgcttgac        | qRT-PCR                                                 |                              |
| <i>Nb</i> EF1 RTR     | aagaattcacagggacagttccaatacca      |                                                         |                              |
| <i>Nb</i> Acre31 RTF  | aattcggccatcgtgatcttggtc           |                                                         |                              |
| <i>Nb</i> Acre31 RTR  | gagaaactgggattgcctgaagga           |                                                         |                              |
| <i>Nb</i> WRKY22 RTF  | aaggtccgggatctacatgcggtggt         |                                                         |                              |
| <i>Nb</i> WRKY22 RTR  | aagaattccgggtcggatctatttcg         |                                                         |                              |
| <i>St</i> Actin97 RTF | ctctgactatgaacaggaac               |                                                         |                              |
| <i>St</i> Actin97 RTR | aaggacctcaggacaccg                 |                                                         |                              |
| RHA1B RTF             | tggaaccactcaactcctcc               |                                                         |                              |
| RHA1B RTR             | cacatctgctccgctgacaat              |                                                         |                              |
| RHA1B ISHF            | tggcggtaattctggtctc                |                                                         | <i>in situ</i> hybridization |
| RHA1B ISHR            | caaggttcggaggagttgag               |                                                         |                              |
